# Supplementary material for: TubZ filament assembly dynamics requires the flexible C-terminal tail
Source: PubMed Central journal article supplement (PMC5322520; doi:10.1038/srep43342), 2017-02-23
Supplement: srep43342-s1.pdf [file srep43342-s1.pdf]

## Supplemental Information

TubZ filament assembly dynamics requires the flexible C-terminal tail.

María E. Fuentes-Pérez<sup>2,3</sup>, Rafael Núñez-Ramírez<sup>1</sup>, Alejandro Martín-González<sup>2</sup>, David Juan-Rodríguez<sup>1</sup>, Oscar Llorca<sup>1</sup>, Fernando Moreno-Herrero<sup>2</sup>, María A. Oliva<sup>1\*</sup>.

<sup>1</sup> CSIC – Centro de Investigaciones Biológicas, Department of Chemical and Physical Biology. Madrid, 28040, Spain

<sup>2</sup> CSIC – Centro Nacional de Biotecnología, Department of Macromolecular Structures, Cantoblanco - Madrid, 28049, Spain

<sup>3</sup> Imperial College, London, W120NN, UK

\*Correspondence: [marian@cib.csic.es](mailto:marian@cib.csic.es)

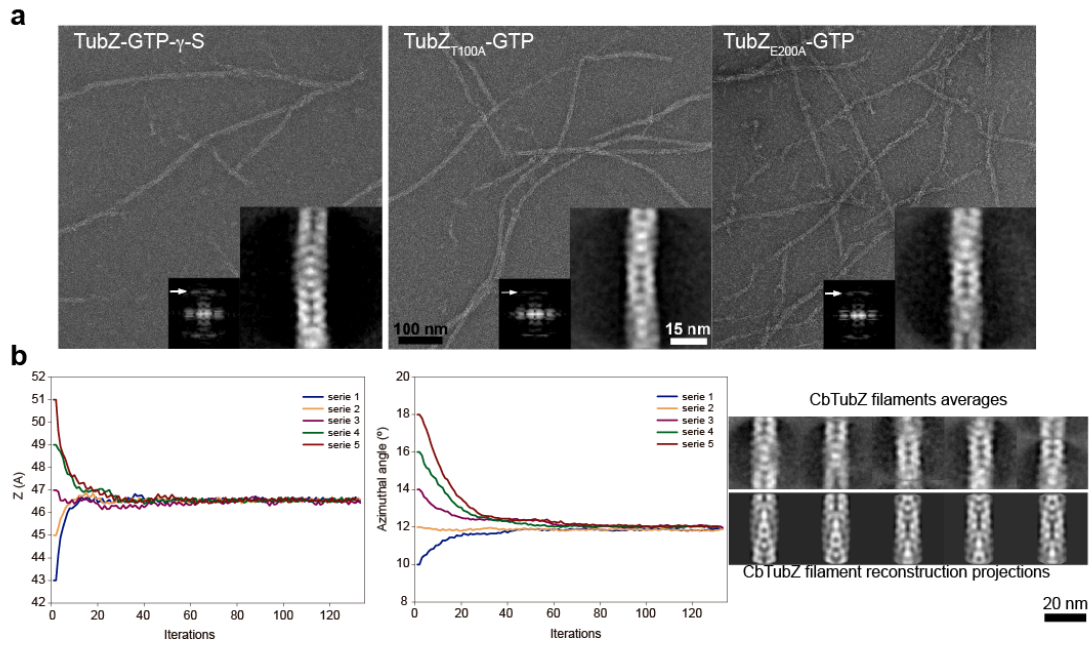

**Figure S1:** **a.** Negative stain EM showing wild type CbTubZ filaments grown in the presence of GTP- $\gamma$ -S, and CbTubZ<sub>T100A</sub> and CbTubZ<sub>E200A</sub> assembled in the presence of GTP. Insets correspond to the averaged filaments and its Fourier transform, where arrow indicates a 4.8 nm longitudinal spacing between molecules **b.** Refinement of the filament helical Z value (left) and the azimuthal angle (middle) showing the convergence to  $\sim 46$  Å and  $\sim 12^\circ$  when starting from very different points. Further, the projections of the reconstructed filament are very similar to the experimental filament averages (right)

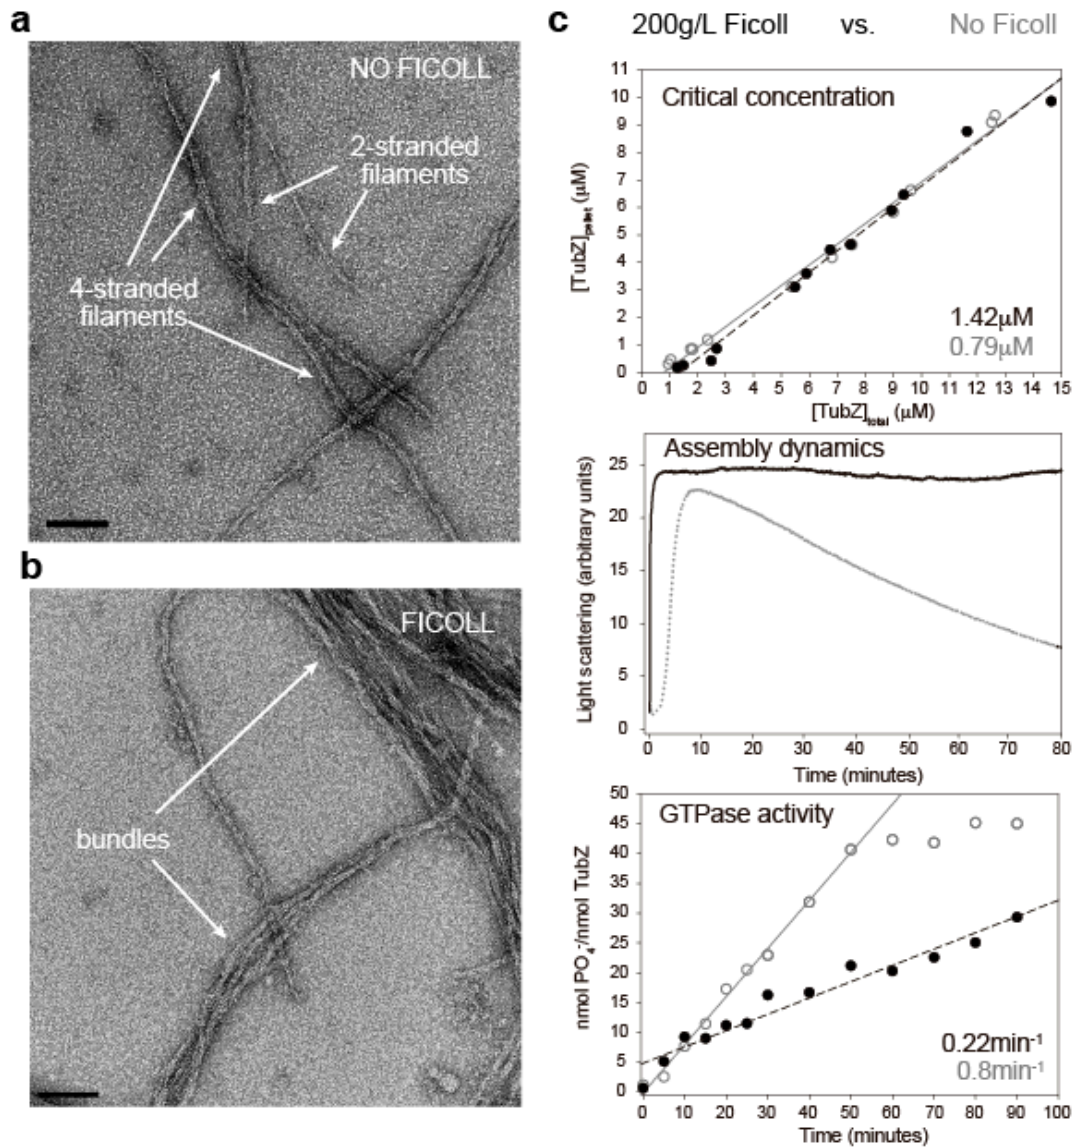

**Figure S2: a-b.** EM images of wild type CbTubZ filaments assembled with GTP/Mg<sup>2+</sup> in diluted buffer and in buffer with Ficoll (200 g/L), showing 2- and 4-stranded filaments and the bundling trend (bars 90 nm). **c.** Critical concentration measurements, light scattering profiles and GTPase activity determination in in buffer with Ficoll (black) vs. diluted buffer (grey).

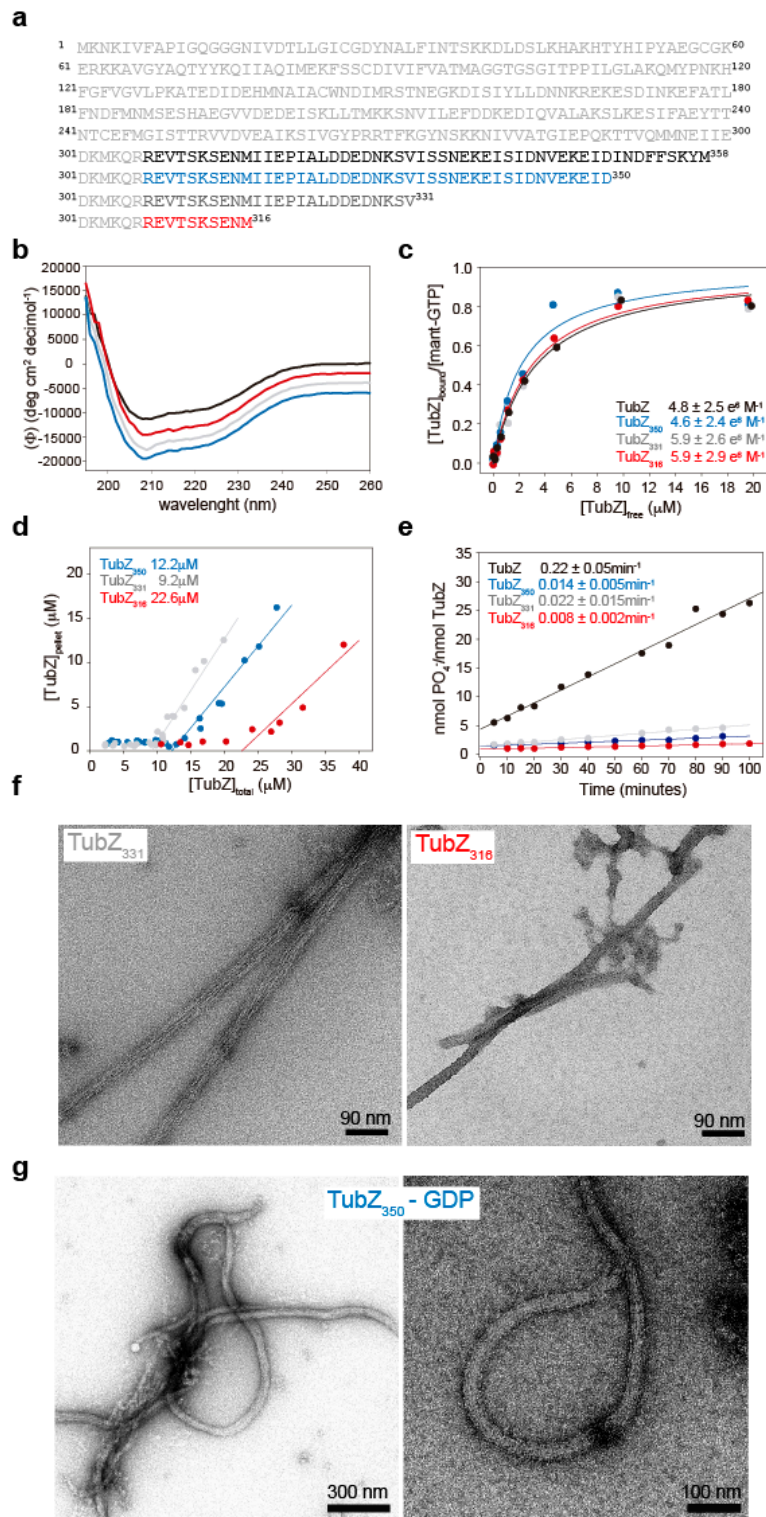

**Figure S3:** **a.** Sequences of wild type and C-tail truncated constructs. Light grey denotes the known structure and colors refer to the C-tail sequence in each different construct: wild type (black), TubZ<sub>350</sub> (blue), TubZ<sub>331</sub> (grey) and TubZ<sub>316</sub> (red). The coloring is conserved along all figures in this study **b.** Circular dichroism spectra showing similar secondary structure composition. The lines have been shifted 2000 units in the Y-axis in order to distinguish them **c.** GTP binding affinity ( $K_B$ ) calculated using GTP fluorescent analog mant-GTP **d.** Critical concentration measurements **e.** GTPase activity analysis using the malachite green assay **f-g.** Negative stain EM of CbTubZ<sub>331</sub> and CbTubZ<sub>316</sub> stiff filament assembled in the presence of GTP/Mg<sup>2+</sup> (f) and CbTubZ<sub>350</sub> flexible filaments polymerized with GDP/Mg<sup>2+</sup> (g)

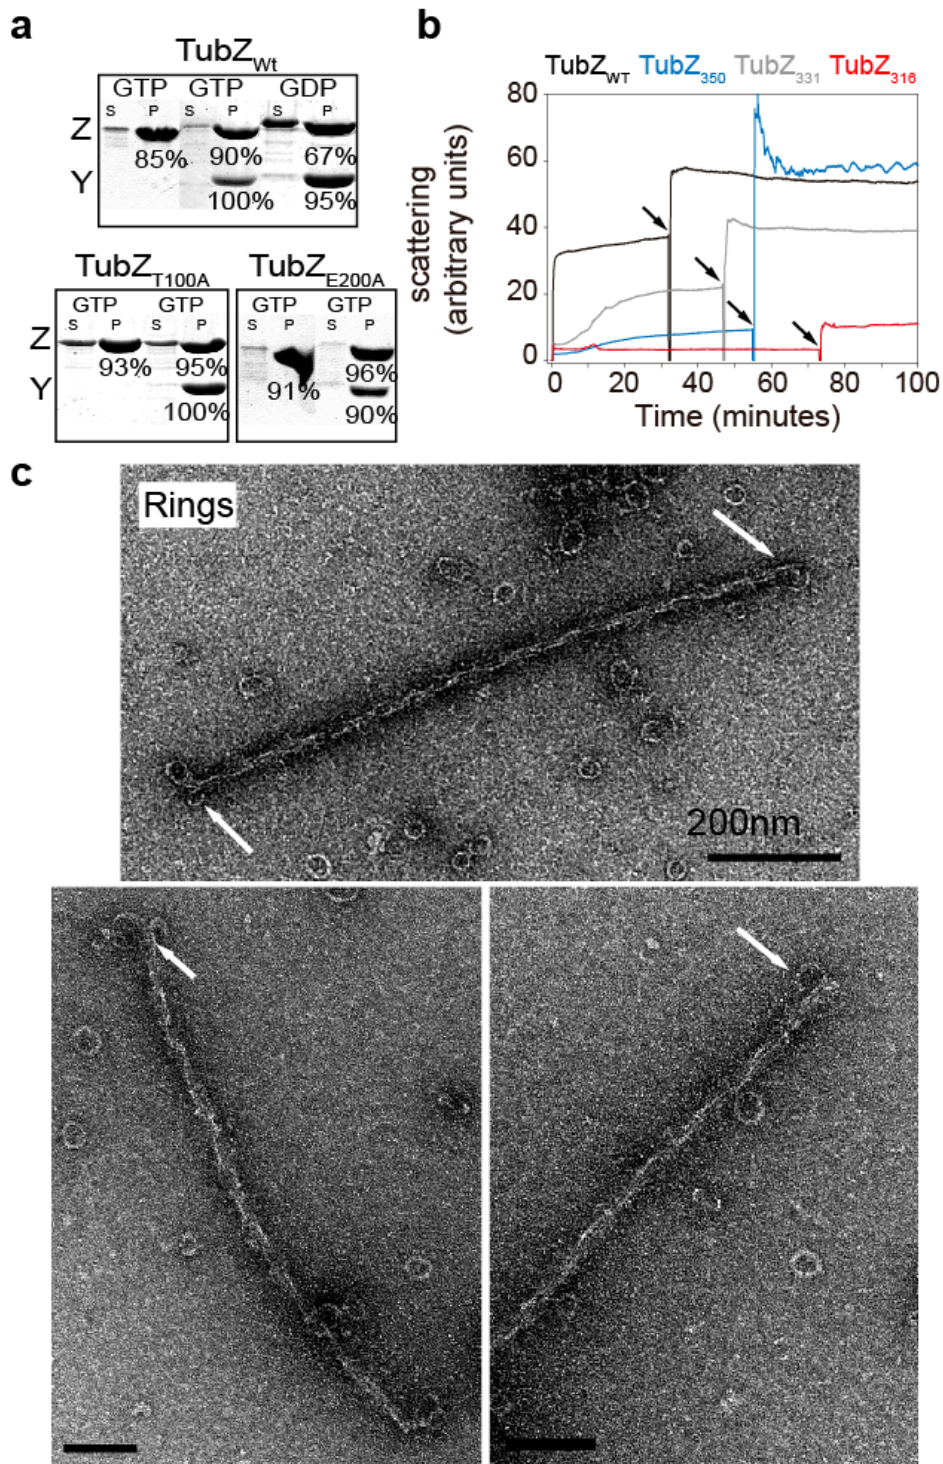

**Figure S4:** **a.** Sedimentation experiments (S supernatant and P pellet) showing the percentage of precipitated protein under assembling conditions of wild type (TubZ<sub>wt</sub>) and mutants (TubZ<sub>E200A</sub> and TubZ<sub>T100A</sub>) in the presence or absence of TubY. The co-sedimentation denotes interaction since TubY alone did not precipitate under those conditions (Oliva et al., 2012) **b.** Light scattering of proteins assembled at a concentration 8-fold above the critical concentration, showing the increase of the scattered signal when TubY is added to pre-assembled wild type (black), TubZ<sub>350</sub> (blue), TubZ<sub>331</sub> (grey) and TubZ<sub>316</sub> (red) filaments. Arrows points to the moment TubY was added **c.** EM images showing the detail of rings formation upon disassembly from filament tips when TubZ<sub>350</sub> filaments are in the presence of TubY.

**Table S1: Data collection and refinement**

| Native TubZ <sub>316</sub> -GDP<br>(4XCQ)          |                                |                            |
|----------------------------------------------------|--------------------------------|----------------------------|
| <b>Data collection</b>                             |                                |                            |
| Space group                                        |                                | C2                         |
| Unit cell parameters                               | <i>a, b, c</i><br>(Å)          | 104.970, 86.342,<br>44.734 |
|                                                    | $\alpha, \beta, \gamma$<br>(°) | 90.00, 92.49, 90.00        |
| Resolution range (Å)                               |                                | 44.69 - 2.39               |
| No. of reflections*                                |                                | 104624 (14464)             |
| No. of unique reflections*                         |                                | 15852 (2479)               |
| Completeness (%)*                                  |                                | 99.4 (96.8)                |
| Redundancy*                                        |                                | 6.6 (5.8)                  |
| C (1/2)*                                           |                                | 99.1 (48.9)                |
| I/σ (I)*                                           |                                | 7.7 (0.98)                 |
| <b>Refinement</b>                                  |                                |                            |
| No. reflections                                    |                                | 15655                      |
| R <sub>work</sub> / R <sub>free</sub> <sup>a</sup> |                                | 0.19/0.24                  |
| No. atoms                                          |                                |                            |
|                                                    | Protein                        | 2381                       |
|                                                    | Water                          | 43                         |
|                                                    | Ligand (GDP)                   | 28                         |
| B-factor                                           |                                |                            |
|                                                    | Protein                        | 51.20                      |
|                                                    | Water                          | 46.33                      |
| r.m.s deviation                                    |                                |                            |
|                                                    | Bond lengths<br>(Å)            | 0.009                      |
|                                                    | Bond angles<br>(°)             | 1.181                      |

\* Highest resolution shell is shown in parenthesis

#### SUPPLEMENTAL REFERENCES

Oliva, M.A., Martin-Galiano, A.J., Sakaguchi, Y., and Andreu, J.M. (2012). Tubulin homolog TubZ in a phage-encoded partition system. *Proceedings of the National Academy of Sciences of the United States of America* *109*, 7711-7716.
